# Supplementary material for: Emerging investigator series: post-synthesis modification of reverse osmosis membranes for the enhanced separation of small neutral molecules
Source: Royal Society of Chemistry journal article supplement (doi:10.1039/d3ew00401e), 2023-01-01
Supplement: d3ew00401e1.pdf [file d3ew00401e1.pdf]

1 **Supporting Information**

2 **Emerging investigators series: Post -Synthesis Modification of Reverse Osmosis**

3 **Membranes for the Enhanced Separation of Small Neutral Molecules**

4 Shahriar Habib†, Madison A. Wilkins†, and Steven T. Weinman\*

5 Department of Chemical and Biological Engineering, The University of Alabama, Tuscaloosa,

6 AL 35487, USA

7 \*Corresponding author: Tel: +1 (205)-348-8516, Fax: +1 (205)-348-7558. Email address:

8 [stweinman@eng.ua.edu](mailto:stweinman@eng.ua.edu)

9 †These authors contributed equally to this work.

10  
11 **Calibration curve for NaCl solution and Urea solution**

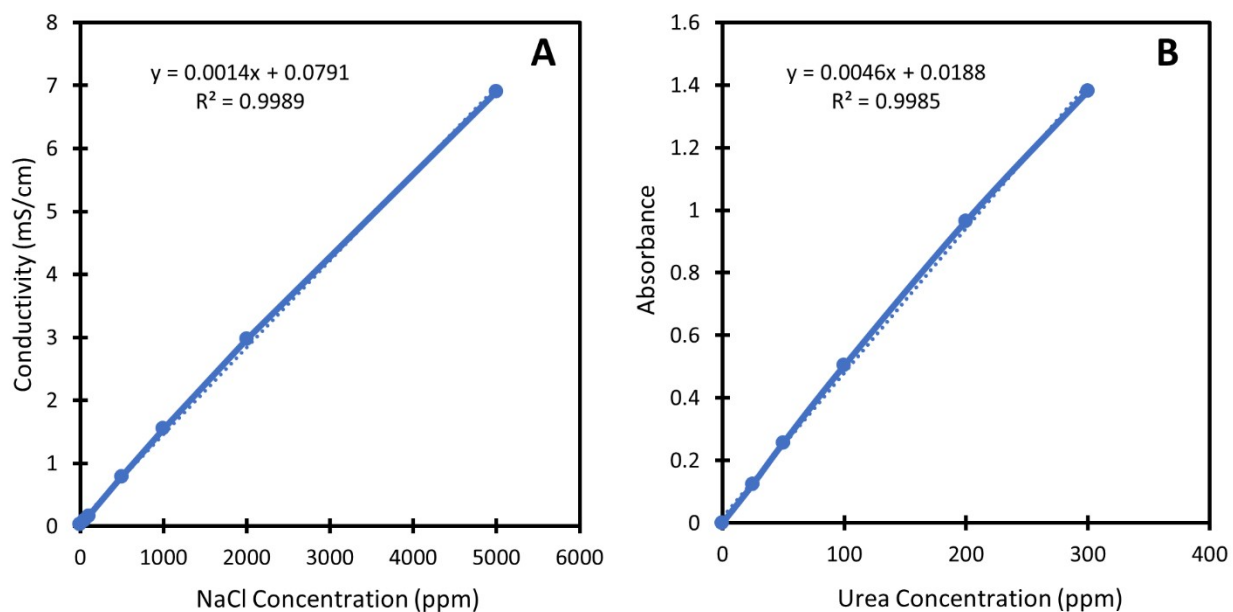

12  
13 **Figure S1.** Calibration curve for (A) NaCl solutions and (B) urea solutions in water.

17 **FTIR data (1200 cm<sup>-1</sup> - 1800 cm<sup>-1</sup> range) for XLE membranes modified using amines in post**  
18 **modification**

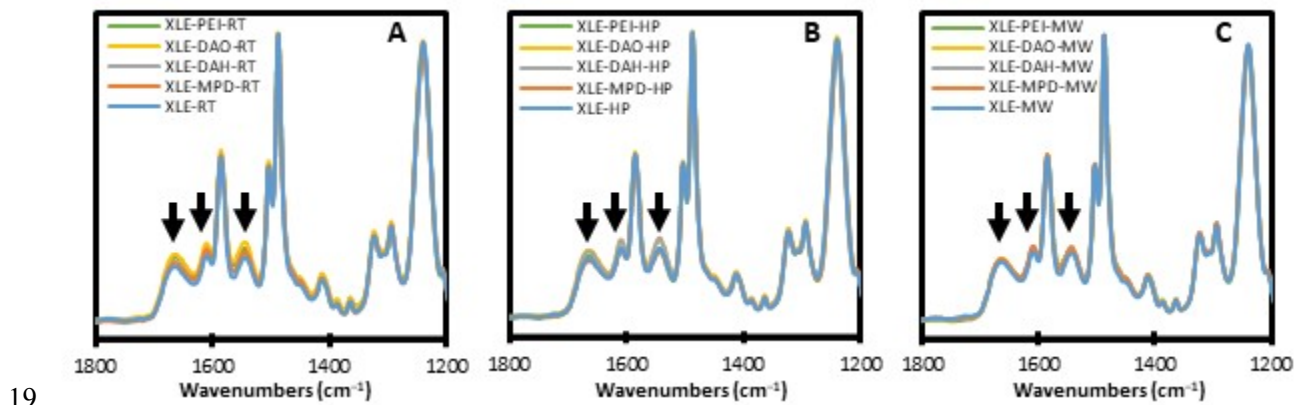

20 **Figure S2.** ATR-FTIR spectra of (A) XLE membranes modified with/without amines at room  
21 temperature, (B) XLE membranes modified with/without amines and then heat treated with the  
22 hot plate, and (C) XLE membranes modified with/without amines and then heat treated with the  
23 microwave oven.

24

25 **SEM data for XLE membranes modified using amines in post modification**

26 The control and modified XLE membrane surface morphology was studied using an Apreo  
27 field emission scanning electron microscope (FE-SEM, Thermo Fisher Scientific). The membrane  
28 samples were dried, attached with carbon tape to aluminum stabs, and sputter-coated with ~12 nm  
29 of gold (MCM-200 ion sputter coater, SEC Co., Ltd., Korea) prior to SEM imaging. The SEM  
30 images were taken at an accelerating voltage of 5 kV, a current voltage of 50 pA, and a  
31 magnification of 10,000x.

32

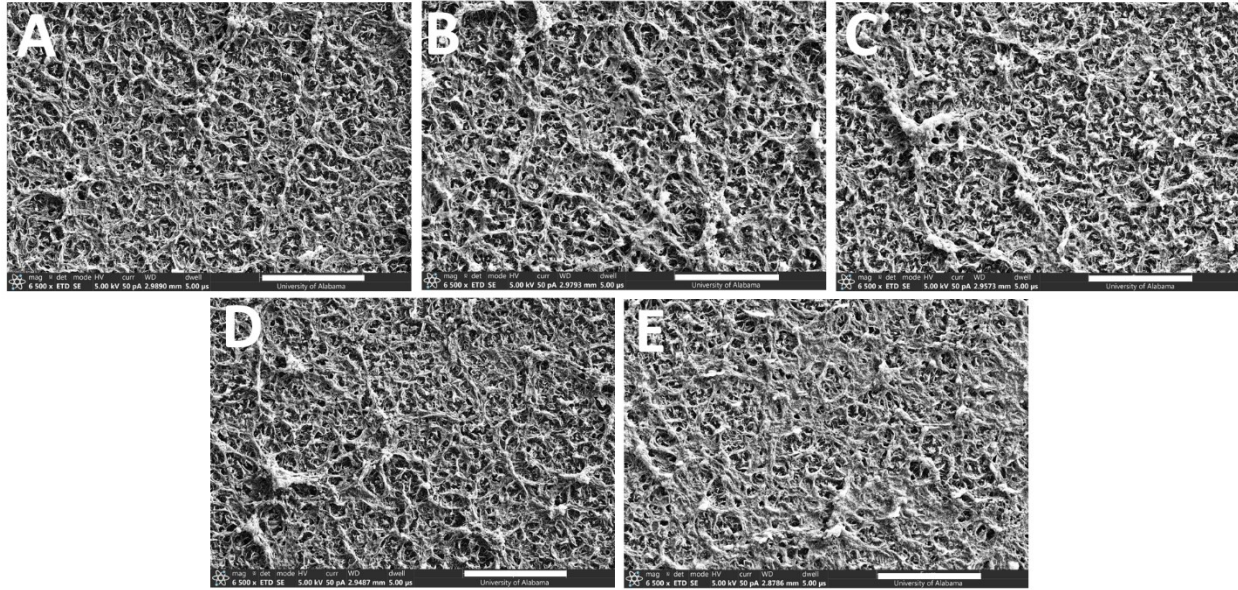

33

34 **Figure S3.** SEM images of (A) XLE-RT, (B) XLE-DAH-RT, (C) XLE-DAO-RT, (D) XLE-MPD-  
 35 RT, and (E) XLE-PEI-RT membranes. The white scale bar represents 5  $\mu\text{m}$ .

36

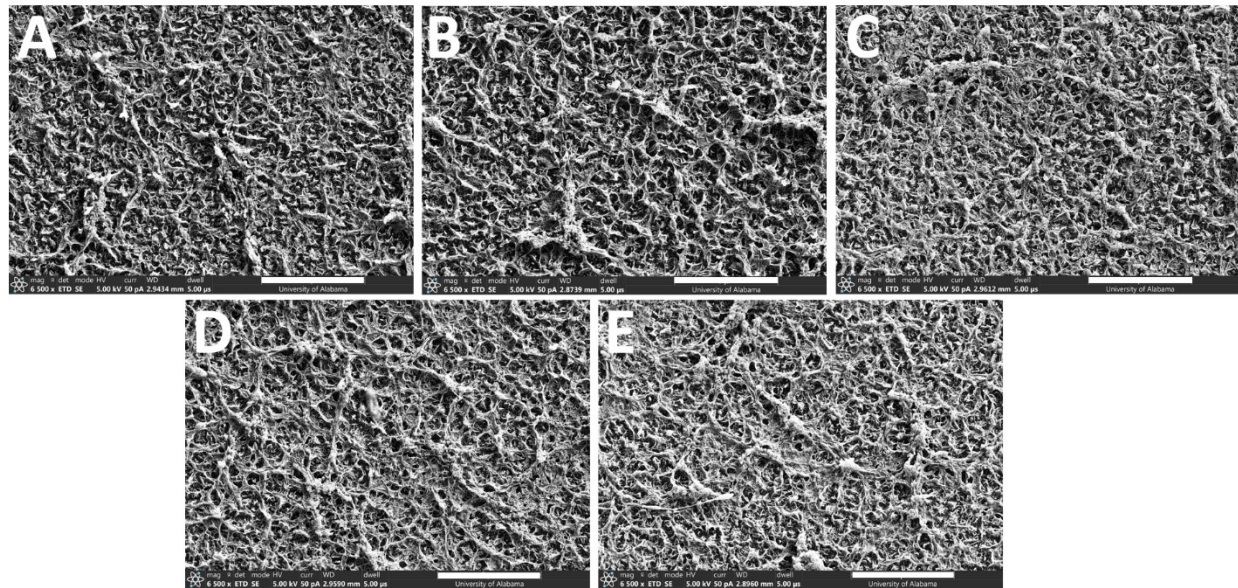

37

38 **Figure S4.** SEM images of (A) XLE-HP, (B) XLE-DAH-HP, (C) XLE-DAO-HP, (D) XLE-MPD-  
 39 HP, and (E) XLE-PEI-HP membranes. The white scale bar represents 5  $\mu\text{m}$ .

40

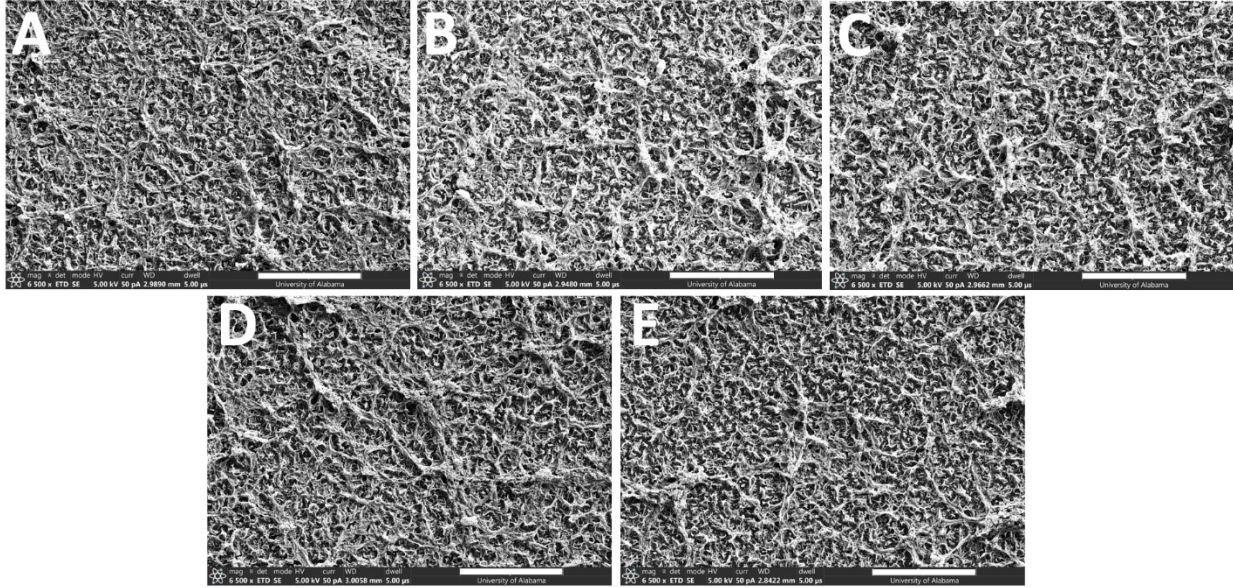

41

42 **Figure S5.** SEM images of (A) XLE-MW, (B) XLE-DAH-MW, (C) XLE-DAO-MW, (D) XLE-  
43 MPD-MW, and (E) XLE-PEI-MW membranes. The white scale bar represents 5  $\mu\text{m}$ .

44

#### 45 **Results of Paired t-tests**

46 Results from Paired Two sample t-test for Means Hypothesis testing was done to determine  
47 statistical relevance of the data sets. EXCEL (Microsoft O365 Version 1908) was used for all  
48 statistical analyses. All tests were done using 95% confidence ( $\alpha = 0.05$ ); therefore, if the p-value  
49 is greater than  $\alpha$  then the means are considered to be equal and if the p-value is less than  $\alpha$  then the  
50 means are considered to be unequal. **Table S1** shows the results from the statistical tests on the  
51 contact angle from **Figure 3** in the main document. **Table S2** and **Table S3** show the results from  
52 the statistical tests on the pure water permeance and NaCl rejection data from **Figures 4A, 4B,**  
53 **and 4C** in the main document for the 2,000 ppm NaCl feed. **Table S4** shows the results from the  
54 statistical tests on the urea rejection data from **Figure 5** in the main document for the 500 ppm  
55 urea feed. **Table S5** shows the results from the statistical tests on the boron rejection data from  
56 **Figure 6** in the main document for the 40 ppm boric acid feed.

57 **Table S1.** Results of paired t-tests on pure water permeance.

| <b>Group 1 Data</b> | <b>Group 2 Data</b> | <b>Data</b>          | <b>Two-tailed P value</b> | <b>Result of Difference</b>   |
|---------------------|---------------------|----------------------|---------------------------|-------------------------------|
| XLE-RT              | XLE-DAH-RT          | Pure Water Permeance | 0.0232                    | Statistically significant     |
| XLE-RT              | XLE-DAO-RT          | Pure Water Permeance | 0.0000                    | Statistically significant     |
| XLE-RT              | XLE-MPD-RT          | Pure Water Permeance | 0.0005                    | Statistically significant     |
| XLE-RT              | XLE-PEI-RT          | Pure Water Permeance | 0.0006                    | Statistically significant     |
| XLE-HP              | XLE-DAH-HP          | Pure Water Permeance | 0.0043                    | Statistically significant     |
| XLE-HP              | XLE-DAO-HP          | Pure Water Permeance | 0.0002                    | Statistically significant     |
| XLE-HP              | XLE-MPD-HP          | Pure Water Permeance | 0.0045                    | Statistically significant     |
| XLE-HP              | XLE-PEI-HP          | Pure Water Permeance | 0.0036                    | Statistically significant     |
| XLE-MW              | XLE-DAH-MW          | Pure Water Permeance | 0.5432                    | Not statistically significant |
| XLE-MW              | XLE-DAO-MW          | Pure Water Permeance | 0.0051                    | Statistically significant     |
| XLE-MW              | XLE-MPD-MW          | Pure Water Permeance | 0.6928                    | Not statistically significant |
| XLE-MW              | XLE-PEI-MW          | Pure Water Permeance | 0.3020                    | Not statistically significant |
| XLE-DAH-HP          | XLE-DAH-MW          | Pure Water Permeance | 0.2805                    | Not statistically significant |
| XLE-DAH-RT          | XLE-DAH-MW          | Pure Water Permeance | 0.0046                    | Statistically significant     |
| XLE-DAH-RT          | XLE-DAH-HP          | Pure Water Permeance | 0.0048                    | Statistically significant     |
| XLE-DAO-HP          | XLE-DAO-MW          | Pure Water Permeance | 0.1943                    | Not statistically significant |
| XLE-DAO-RT          | XLE-DAO-MW          | Pure Water Permeance | 0.1499                    | Statistically significant     |

|            |            |                      |        |                               |
|------------|------------|----------------------|--------|-------------------------------|
| XLE-DAO-RT | XLE-DAO-HP | Pure Water Permeance | 0.0105 | Not statistically significant |
| XLE-MPD-HP | XLE-MPD-MW | Pure Water Permeance | 0.1274 | Not statistically significant |
| XLE-MPD-RT | XLE-MPD-MW | Pure Water Permeance | 0.0086 | Statistically significant     |
| XLE-MPD-RT | XLE-MPD-HP | Pure Water Permeance | 0.0165 | Not statistically significant |
| XLE-PEI-HP | XLE-PEI-MW | Pure Water Permeance | 0.4252 | Not statistically significant |
| XLE-PEI-RT | XLE-PEI-MW | Pure Water Permeance | 0.0219 | Statistically significant     |
| XLE-PEI-RT | XLE-PEI-HP | Pure Water Permeance | 0.0743 | Not statistically significant |
| XLE-RT     | XLE-MW     | Pure Water Permeance | 0.0002 | Statistically significant     |
| XLE-RT     | XLE-HP     | Pure Water Permeance | 0.0081 | Statistically significant     |
| XLE-HP     | XLE-MW     | Pure Water Permeance | 0.0109 | Statistically significant     |

58

59 **Table S2.** Results of paired t-tests on NaCl rejection.

| <b>Group 1 Data</b> | <b>Group 2 Data</b> | <b>Data</b>    | <b>Two-tailed P value</b> | <b>Result of Difference</b>   |
|---------------------|---------------------|----------------|---------------------------|-------------------------------|
| XLE-RT              | XLE-DAH-RT          | NaCl Rejection | 0.6067                    | Not statistically significant |
| XLE-RT              | XLE-DAO-RT          | NaCl Rejection | 0.0145                    | Statistically significant     |
| XLE-RT              | XLE-MPD-RT          | NaCl Rejection | 0.7274                    | Not statistically significant |
| XLE-RT              | XLE-PEI-RT          | NaCl Rejection | 0.2442                    | Not statistically significant |
| XLE-HP              | XLE-DAH-HP          | NaCl Rejection | 0.1662                    | Not statistically significant |
| XLE-HP              | XLE-DAO-HP          | NaCl Rejection | 0.3582                    | Not statistically significant |

|            |            |                |        |                               |
|------------|------------|----------------|--------|-------------------------------|
| XLE-HP     | XLE-MPD-HP | NaCl Rejection | 0.7392 | Not statistically significant |
| XLE-HP     | XLE-PEI-HP | NaCl Rejection | 0.2135 | Not statistically significant |
| XLE-MW     | XLE-DAH-MW | NaCl Rejection | 0.5852 | Not statistically significant |
| XLE-MW     | XLE-DAO-MW | NaCl Rejection | 0.4429 | Not statistically significant |
| XLE-MW     | XLE-MPD-MW | NaCl Rejection | 0.1246 | Not statistically significant |
| XLE-MW     | XLE-PEI-MW | NaCl Rejection | 0.3394 | Not statistically significant |
| XLE-DAH-HP | XLE-DAH-MW | NaCl Rejection | 0.1392 | Not statistically significant |
| XLE-DAH-RT | XLE-DAH-MW | NaCl Rejection | 0.8024 | Not statistically significant |
| XLE-DAH-RT | XLE-DAH-HP | NaCl Rejection | 0.2104 | Not statistically significant |
| XLE-DAO-HP | XLE-DAO-MW | NaCl Rejection | 0.1498 | Not statistically significant |
| XLE-DAO-RT | XLE-DAO-MW | NaCl Rejection | 0.0079 | Statistically significant     |
| XLE-DAO-RT | XLE-DAO-HP | NaCl Rejection | 0.1816 | Not statistically significant |
| XLE-MPD-HP | XLE-MPD-MW | NaCl Rejection | 0.1833 | Not statistically significant |
| XLE-MPD-RT | XLE-MPD-MW | NaCl Rejection | 0.0495 | Statistically significant     |
| XLE-MPD-RT | XLE-MPD-HP | NaCl Rejection | 0.8884 | Not statistically significant |
| XLE-PEI-HP | XLE-PEI-MW | NaCl Rejection | 0.4756 | Not statistically significant |
| XLE-PEI-RT | XLE-PEI-MW | NaCl Rejection | 0.5417 | Not statistically significant |
| XLE-PEI-RT | XLE-PEI-HP | NaCl Rejection | 0.8227 | Not statistically significant |

|        |        |                |        |                               |
|--------|--------|----------------|--------|-------------------------------|
| XLE-RT | XLE-MW | NaCl Rejection | 0.7907 | Not statistically significant |
| XLE-RT | XLE-HP | NaCl Rejection | 0.6952 | Not statistically significant |
| XLE-HP | XLE-MW | NaCl Rejection | 0.8626 | Not statistically significant |

60

61 **Table S3.** Results of paired t-tests on urea rejection.

| <b>Group 1 Data</b> | <b>Group 2 Data</b> | <b>Data</b>    | <b>Two-tailed P value</b> | <b>Result of Difference</b>   |
|---------------------|---------------------|----------------|---------------------------|-------------------------------|
| XLE-RT              | XLE-DAH-RT          | Urea Rejection | 0.0143                    | Statistically significant     |
| XLE-RT              | XLE-DAO-RT          | Urea Rejection | 0.0000                    | Statistically significant     |
| XLE-RT              | XLE-MPD-RT          | Urea Rejection | 0.0060                    | Statistically significant     |
| XLE-RT              | XLE-PEI-RT          | Urea Rejection | 0.0040                    | Statistically significant     |
| XLE-HP              | XLE-DAH-HP          | Urea Rejection | 0.0075                    | Statistically significant     |
| XLE-HP              | XLE-DAO-HP          | Urea Rejection | 0.0010                    | Statistically significant     |
| XLE-HP              | XLE-MPD-HP          | Urea Rejection | 0.0106                    | Statistically significant     |
| XLE-HP              | XLE-PEI-HP          | Urea Rejection | 0.7750                    | Not statistically significant |
| XLE-MW              | XLE-DAH-MW          | Urea Rejection | 0.0034                    | Statistically significant     |
| XLE-MW              | XLE-DAO-MW          | Urea Rejection | 0.0009                    | Statistically significant     |
| XLE-MW              | XLE-MPD-MW          | Urea Rejection | 0.0001                    | Statistically significant     |
| XLE-MW              | XLE-PEI-MW          | Urea Rejection | 0.0374                    | Statistically significant     |
| XLE-DAH-HP          | XLE-DAH-MW          | Urea Rejection | 0.7339                    | Not statistically significant |



|            |            |                |        |                               |
|------------|------------|----------------|--------|-------------------------------|
| XLE-DAH-RT | XLE-DAH-MW | Urea Rejection | 0.0028 | Statistically significant     |
| XLE-DAH-RT | XLE-DAH-HP | Urea Rejection | 0.0015 | Statistically significant     |
| XLE-DAO-HP | XLE-DAO-MW | Urea Rejection | 0.9818 | Not statistically significant |
| XLE-DAO-RT | XLE-DAO-MW | Urea Rejection | 0.0216 | Statistically significant     |
| XLE-DAO-RT | XLE-DAO-HP | Urea Rejection | 0.0009 | Statistically significant     |
| XLE-MPD-HP | XLE-MPD-MW | Urea Rejection | 0.0675 | Not statistically significant |
| XLE-MPD-RT | XLE-MPD-MW | Urea Rejection | 0.0019 | Statistically significant     |
| XLE-MPD-RT | XLE-MPD-HP | Urea Rejection | 0.0018 | Statistically significant     |
| XLE-PEI-HP | XLE-PEI-MW | Urea Rejection | 0.8112 | Not statistically significant |
| XLE-PEI-RT | XLE-PEI-MW | Urea Rejection | 0.0000 | Statistically significant     |
| XLE-PEI-RT | XLE-PEI-HP | Urea Rejection | 0.0070 | Statistically significant     |
| XLE-RT     | XLE-MW     | Urea Rejection | 0.0000 | Statistically significant     |
| XLE-RT     | XLE-HP     | Urea Rejection | 0.0002 | Statistically significant     |
| XLE-HP     | XLE-MW     | Urea Rejection | 0.8161 | Not statistically significant |

62

63 **Table S4.** Results of paired t-tests on boron rejection.

| <b>Group 1 Data</b> | <b>Group 2 Data</b> | <b>Data</b>     | <b>Two-tailed P value</b> | <b>Result of Difference</b> |
|---------------------|---------------------|-----------------|---------------------------|-----------------------------|
| XLE-RT              | XLE-DAH-HP          | Boron Rejection | 0.0003                    | Statistically significant   |
| XLE-RT              | XLE-DAO-HP          | Boron Rejection | 0.0031                    | Statistically significant   |

|        |            |                 |        |                           |
|--------|------------|-----------------|--------|---------------------------|
| XLE-RT | XLE-MPD-HP | Boron Rejection | 0.0002 | Statistically significant |
| XLE-RT | XLE-PEI-HP | Boron Rejection | 0.0428 | Statistically significant |
| XLE-RT | XLE-HP     | Boron Rejection | 0.0034 | Statistically significant |

64

65 **Table S5.** Results of paired t-tests on water contact angle measurement.

| <b>Group 1 Data</b> | <b>Group 2 Data</b> | <b>Data</b>   | <b>Two-tailed P value</b> | <b>Result of Difference</b>   |
|---------------------|---------------------|---------------|---------------------------|-------------------------------|
| XLE-RT              | XLE-DAH-RT          | Contact Angle | 0.0000                    | Statistically significant     |
| XLE-RT              | XLE-DAO-RT          | Contact Angle | 0.0009                    | Statistically significant     |
| XLE-RT              | XLE-MPD-RT          | Contact Angle | 0.0000                    | Statistically significant     |
| XLE-RT              | XLE-PEI-RT          | Contact Angle | 0.0008                    | Statistically significant     |
| XLE-HP              | XLE-DAH-HP          | Contact Angle | 0.0000                    | Statistically significant     |
| XLE-HP              | XLE-DAO-HP          | Contact Angle | 0.0000                    | Statistically significant     |
| XLE-HP              | XLE-MPD-HP          | Contact Angle | 0.0002                    | Statistically significant     |
| XLE-HP              | XLE-PEI-HP          | Contact Angle | 0.0259                    | Statistically significant     |
| XLE-MW              | XLE-DAH-MW          | Contact Angle | 0.0000                    | Statistically significant     |
| XLE-MW              | XLE-DAO-MW          | Contact Angle | 0.0000                    | Statistically significant     |
| XLE-MW              | XLE-MPD-MW          | Contact Angle | 0.0000                    | Statistically significant     |
| XLE-MW              | XLE-PEI-MW          | Contact Angle | 0.0003                    | Statistically significant     |
| XLE-DAH-HP          | XLE-DAH-MW          | Contact Angle | 0.3190                    | Not statistically significant |

|            |            |               |        |                               |
|------------|------------|---------------|--------|-------------------------------|
| XLE-DAH-RT | XLE-DAH-MW | Contact Angle | 0.0014 | Statistically significant     |
| XLE-DAH-RT | XLE-DAH-HP | Contact Angle | 0.0009 | Statistically significant     |
| XLE-DAO-HP | XLE-DAO-MW | Contact Angle | 0.0382 | Statistically significant     |
| XLE-DAO-RT | XLE-DAO-MW | Contact Angle | 0.0025 | Statistically significant     |
| XLE-DAO-RT | XLE-DAO-HP | Contact Angle | 0.1616 | Not statistically significant |
| XLE-MPD-HP | XLE-MPD-MW | Contact Angle | 0.3610 | Not statistically significant |
| XLE-MPD-RT | XLE-MPD-MW | Contact Angle | 0.0654 | Not statistically significant |
| XLE-MPD-RT | XLE-MPD-HP | Contact Angle | 0.0240 | Statistically significant     |
| XLE-PEI-HP | XLE-PEI-MW | Contact Angle | 0.8634 | Not statistically significant |
| XLE-PEI-RT | XLE-PEI-MW | Contact Angle | 0.0726 | Not statistically significant |
| XLE-PEI-RT | XLE-PEI-HP | Contact Angle | 0.1938 | Not statistically significant |
| XLE-RT     | XLE-MW     | Contact Angle | 0.1653 | Not statistically significant |
| XLE-RT     | XLE-HP     | Contact Angle | 0.0102 | Statistically significant     |
| XLE-HP     | XLE-MW     | Contact Angle | 0.1607 | Not statistically significant |

66

67

68

69

70

71 **Minimal projection area,  $pK_{a,s}$ , and Octanol water partition coefficient data of amines used**  
72 **in modified XLE membranes**

73 **Table S6.** Minimal projection area,  $pK_{a,s}$ , and Octanol water partition coefficient data of MPD,  
74 DAH, DAO and PEI from <http://www.chemicalize.org> website.)

| <b>Compound</b>   | <b><math>pK_{a1}</math></b> | <b><math>pK_{a2}</math></b> | <b>Octanol water<br/>Coefficient</b> |
|-------------------|-----------------------------|-----------------------------|--------------------------------------|
| <b>MPD</b>        | 2.73                        | 5.48                        | 0.315                                |
| <b>DAH</b>        | 9.90                        | 10.51                       | 0.044                                |
| <b>DAO</b>        | 9.90                        | 10.51                       | 0.933                                |
| <b>PEI</b>        | 10.16                       | -----                       | -0.279                               |
| <b>Urea</b>       | -----                       | -----                       | -1.364                               |
| <b>Boric Acid</b> | 8.70                        | 12.11                       | -0.509                               |

75
